# Supplementary material for: Bio-sensing on a chip with compact discs and nanofibers
Source: Royal Society of Chemistry journal article supplement (doi:10.1039/b507637d), 2005-01-01
Supplement: b507637d.pdf [file b507637d.pdf]

## Supporting Information for

### Bio-Sensing with Compact Discs and Nanofibers

Mari Tabuchi<sup>\*†</sup>, Kazuyoshi Kobayashi<sup>‡</sup>, Masayuki Fujimoto<sup>§</sup> and Yoshinobu Baba<sup>††</sup>

<sup>\*</sup>Department of Molecular and Pharmaceutical Biotechnology, Graduate School of Pharmaceutical Science,

The University of Tokushima, 1-78 Shomachi, Tokushima 770-8505, Japan

E-mail: [tabuchi@ph.tokushima-u.ac.jp](mailto:tabuchi@ph.tokushima-u.ac.jp)

#### Supporting Figures

We supply the supporting figures to supplement the descriptions in the text.

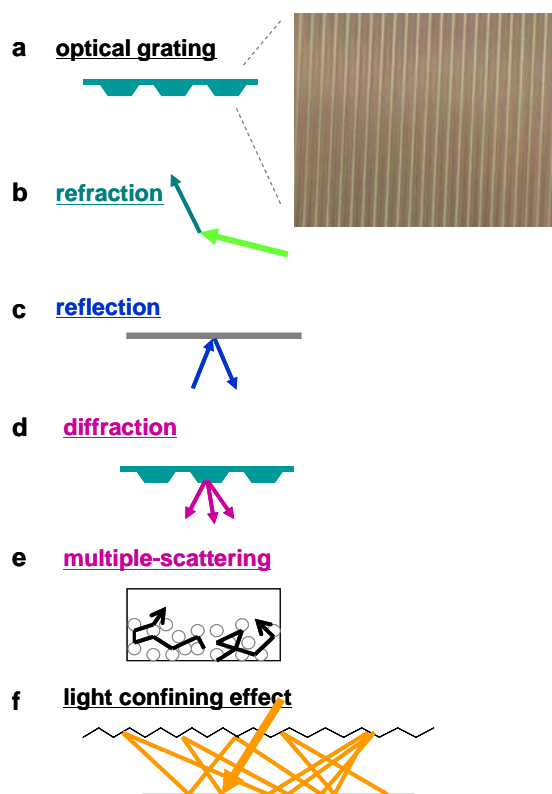

#### Supporting Figure 1

Schematic images of **a**) optical grating, **b**) refraction, **c**) reflection, **d**) diffraction of light, **e**) multiple light scattering, and **f**) light-confining effect (solar cell effect) are shown.

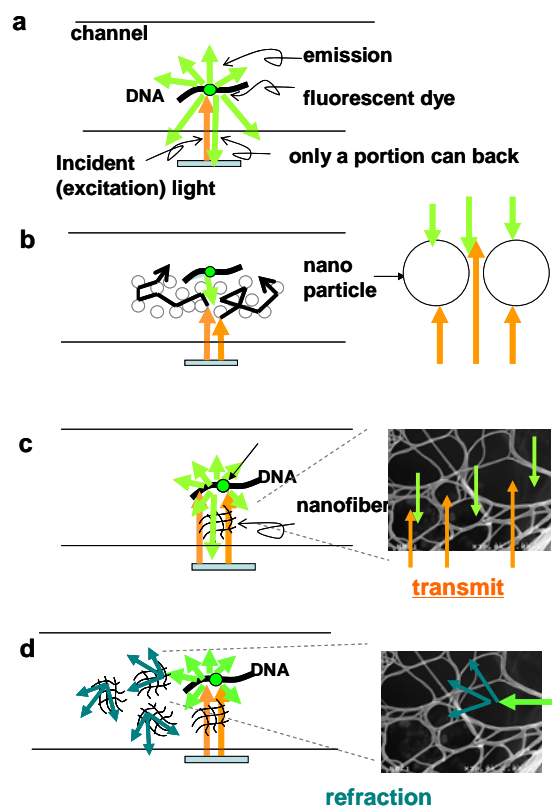

#### Supporting Figure 2

Reflection, diffraction and light-scattering images by media. **a**, The conventional system: the emission of light from fluorescent dye is dispersed spherically. Only a portion of the emitted light can travel back to the detector. **b**, The conventional multiple-light scattering image in the buffer containing nanospheres. Some incident light beams are interrupted by the surface of the nanoparticles. Only a portion of the incident light can travel through the particles. The amount of incident light that hits the DNA will decrease. **c**, Additional nanofiber medium: both incident and excitation lights can travel through the nanopores, so the absorption of emission and excitation lights will be lower than in the conventional methods (a) and b)). **d**, Refraction image on the surface of nanofibers.
